# Supplementary material for: Injectable Platelet-Rich Fibrin as a Drug Carrier Increases the Antibacterial Susceptibility of Antibiotic—Clindamycin Phosphate
Source: MDPI journal article supplement (doi:10.3390/ijms23137407), 2022-07-03
Supplement: s1 [file s1]

# Supplementary File

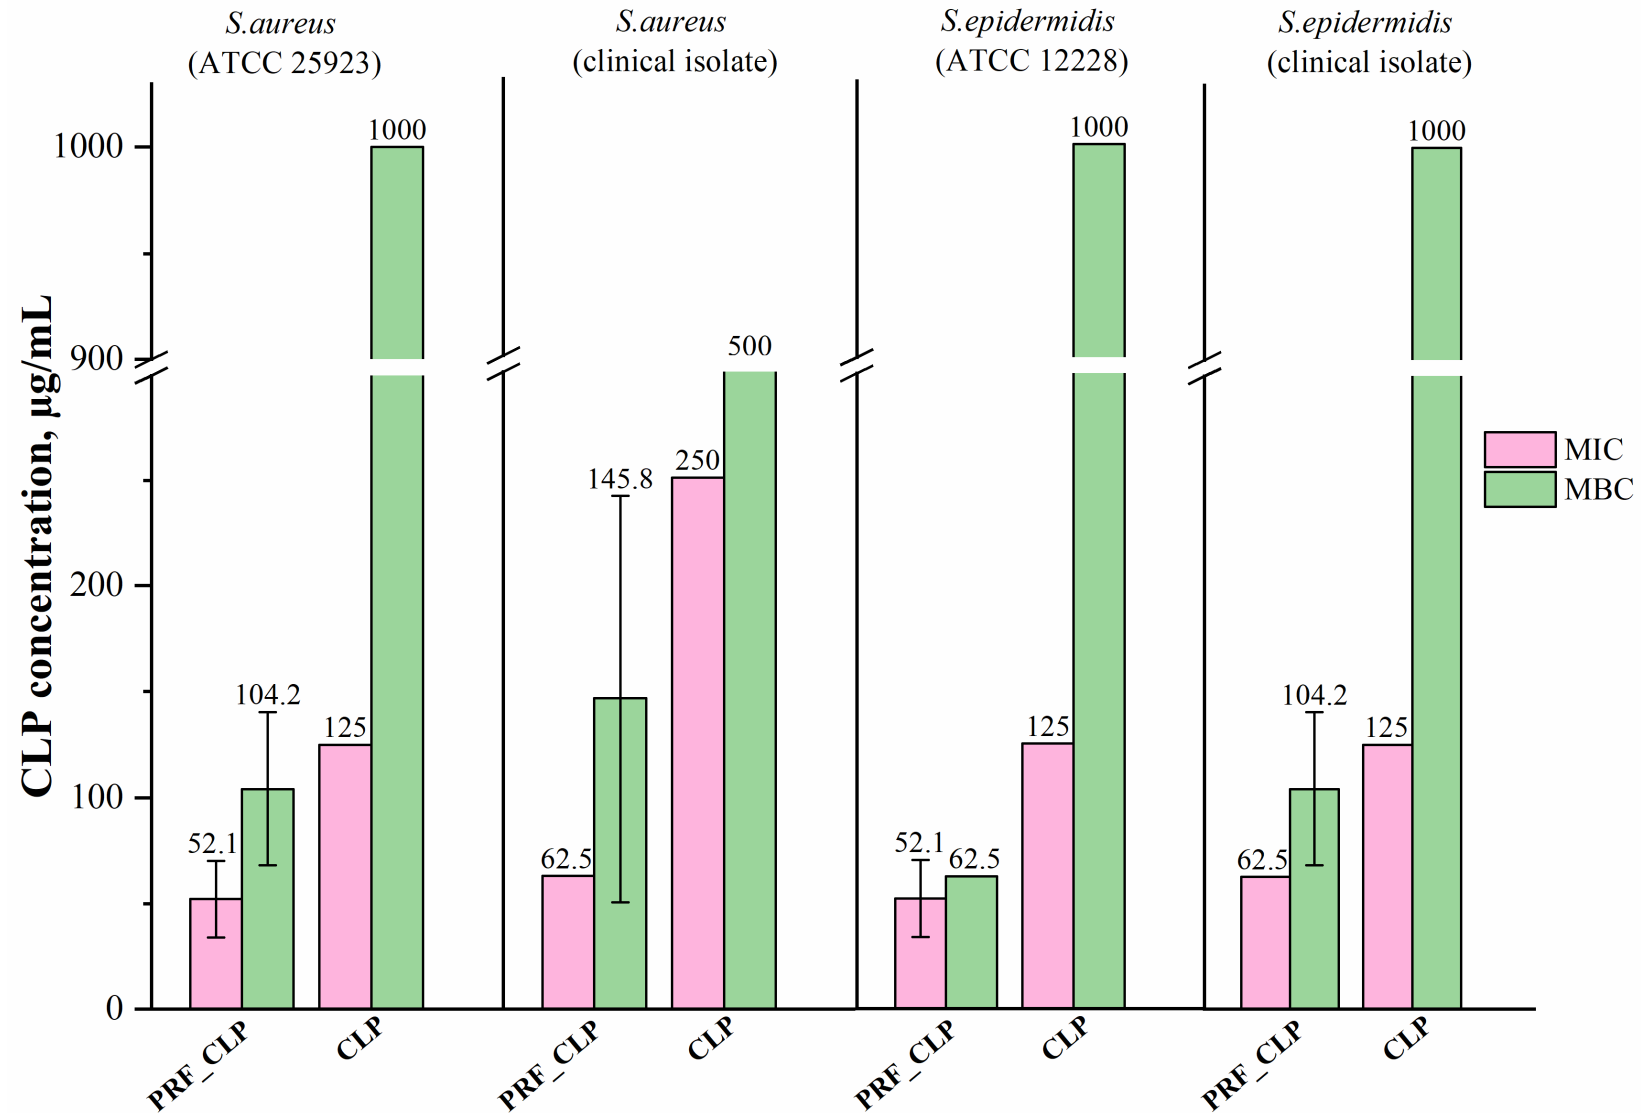

**Figure S1.** MIC and MBC value differences between CLP and PRF\_CLP samples against four bacteria stains (*S. aureus* (ATCC 25923), *S. epidermidis* (ATCC 12228), *S. aureus* (clinical isolate), *S. epidermidis* (clinical isolate)). The graphs show the mean MIC and MBC values calculated from the results of antibacterial tests in 3 donors, compared with the MIC and MBC values obtained with pure CLP.

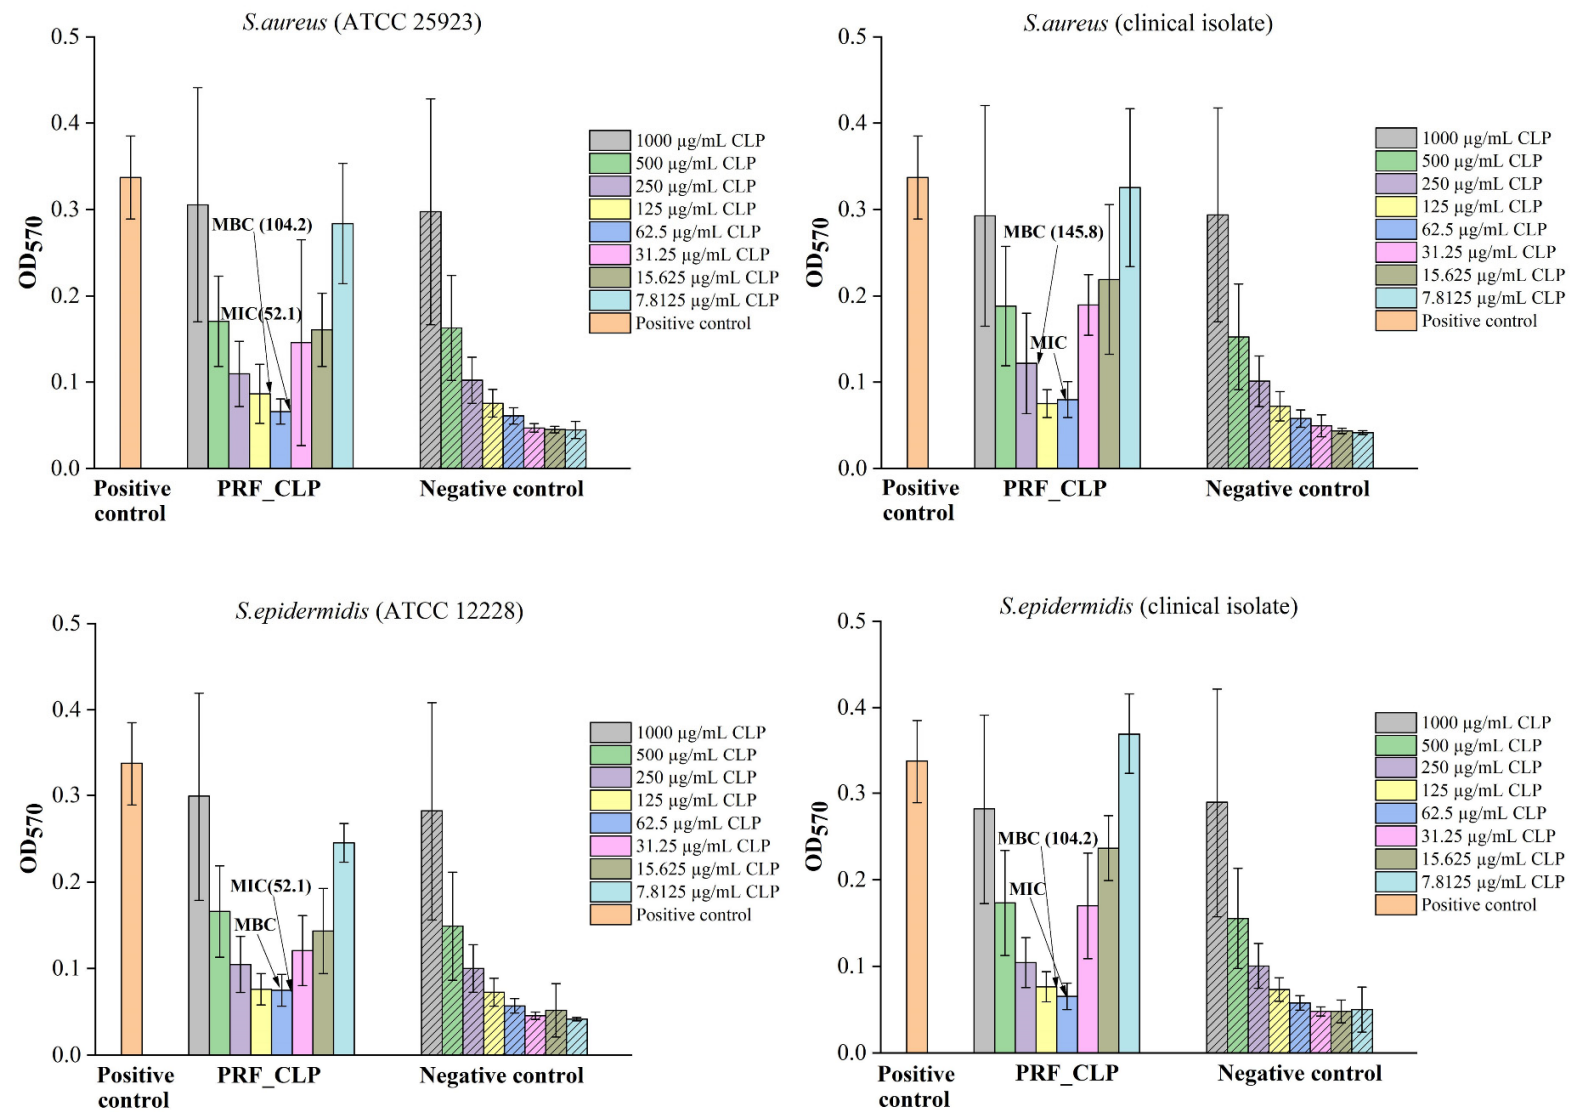

**Figure S2.** Antibacterial properties of PRF\_CLP samples for 4 bacteria strains (*S. aureus* (ATCC 25923), *S. epidermidis* (ATCC 12228), *S. aureus* (clinical isolate), *S. epidermidis* (clinical isolate)). The graphs show the mean MIC and MBC values calculated from the results of 3 donor antibacterial tests. Pure bacterial suspension ( $10^6$  CFU/mL) as positive control and pure sterile Mueller-Hinton broth as negative control were used.

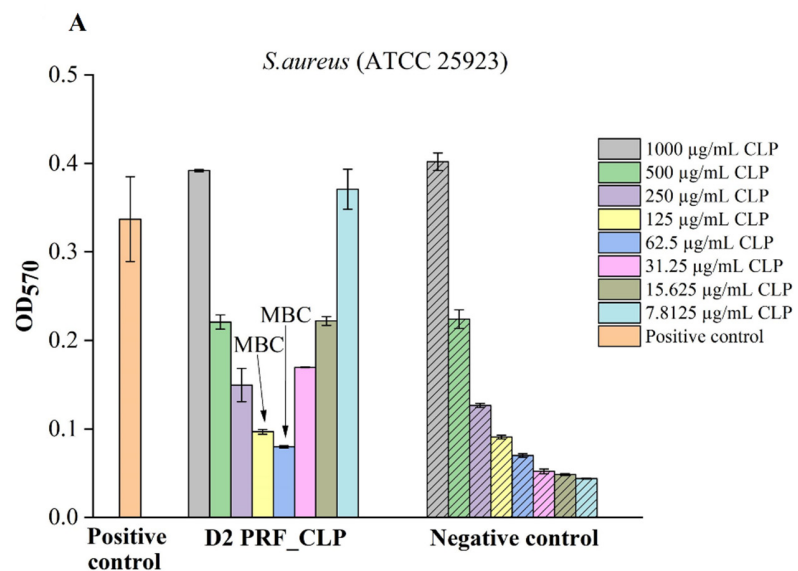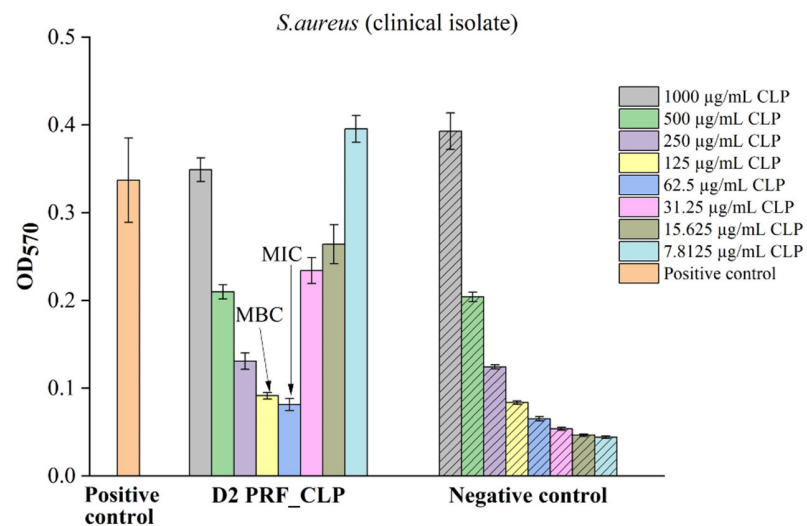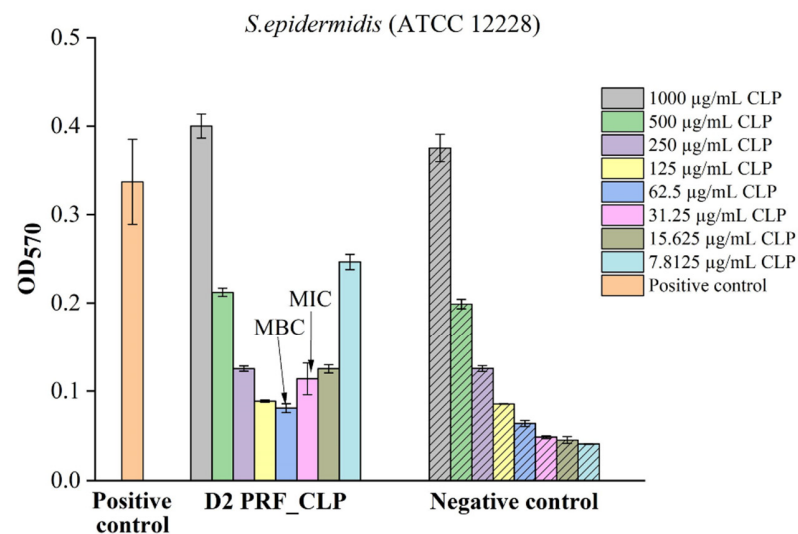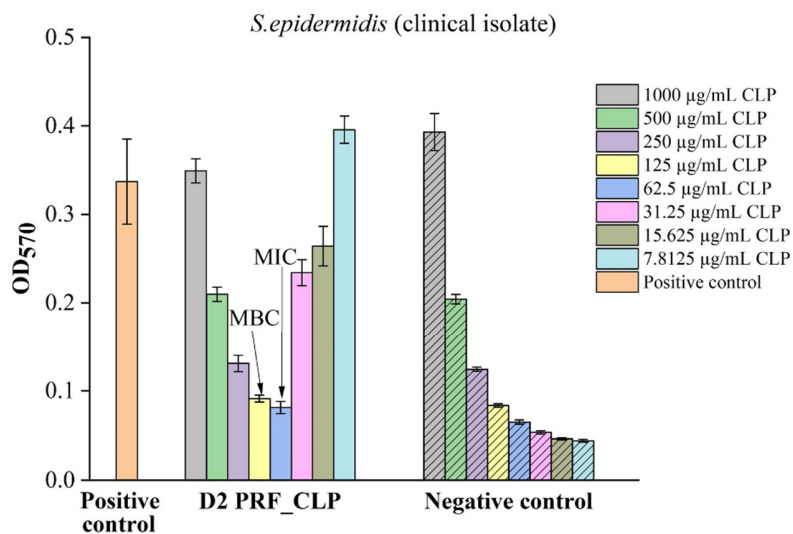

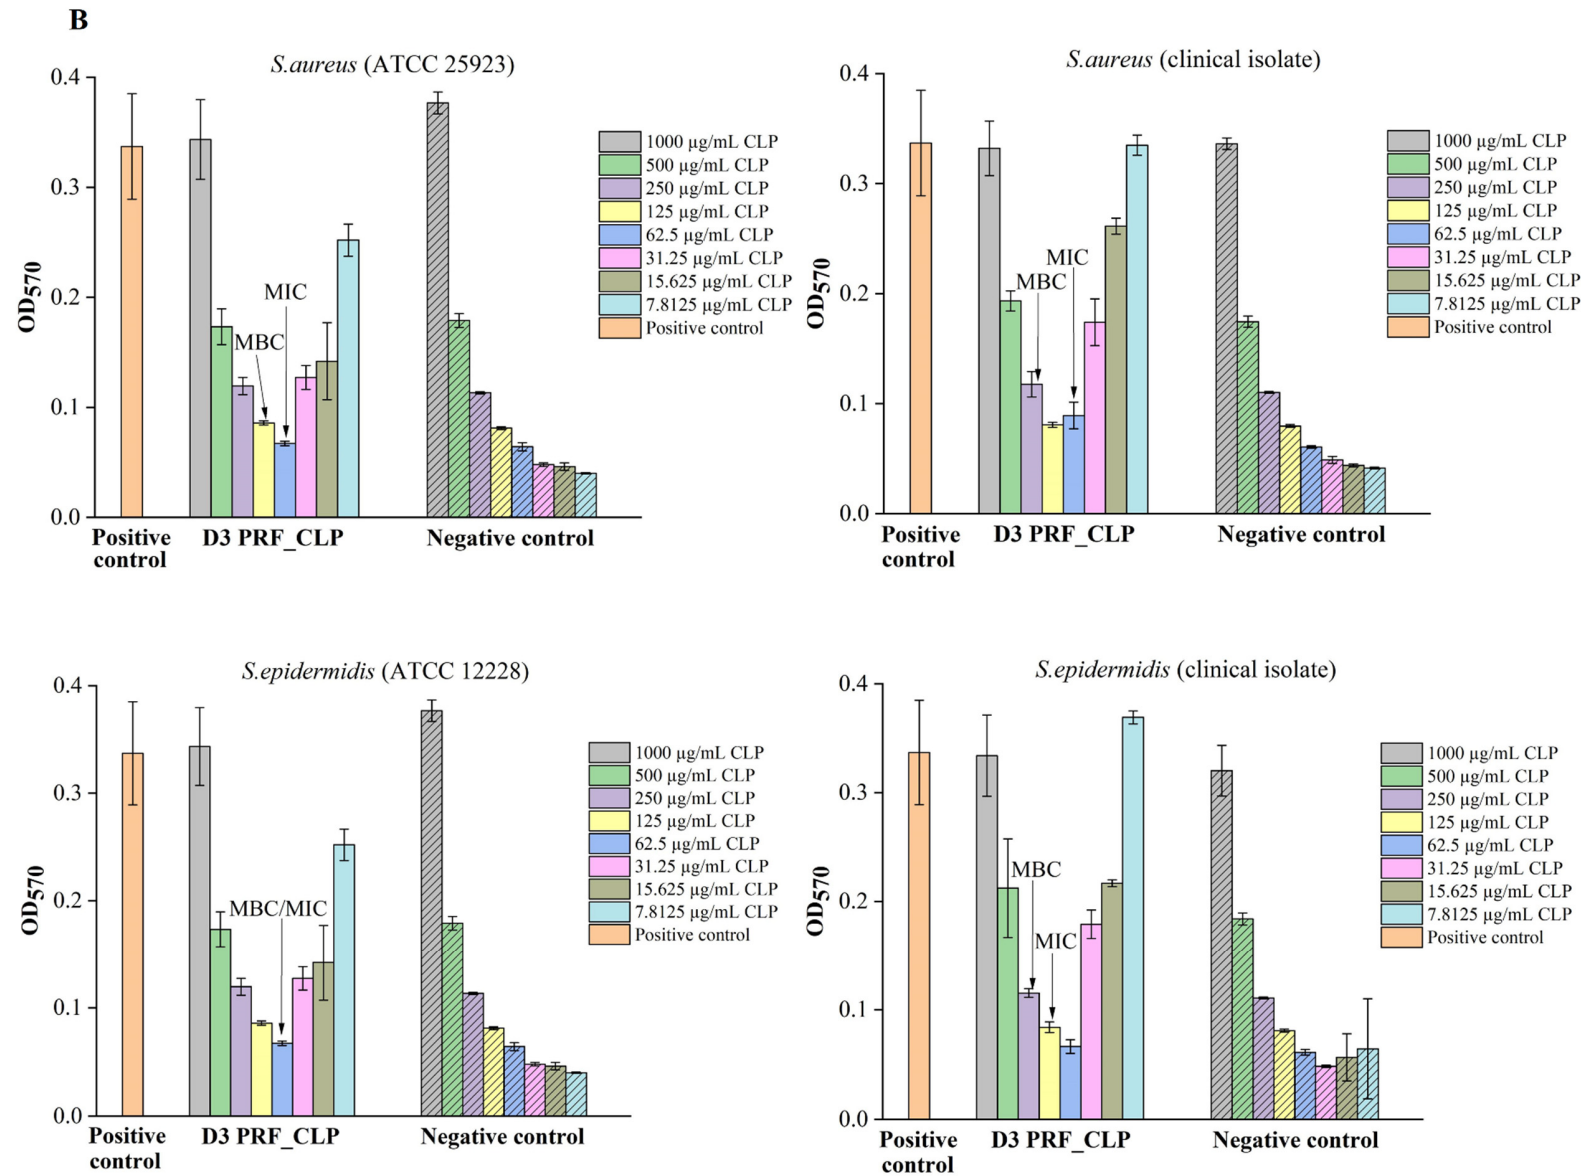

**Figure S3.** Antibacterial properties of PRF\_CLP samples at various concentrations of CLP solution for 4 bacteria strains (*S. aureus* (ATCC 25923), *S. epidermidis* (ATCC 12228), *S. aureus* (clinical isolate), *S. epidermidis* (clinical isolate) : A) For PRF\_CLP samples prepared from donor 2 blood; B) For PRF\_CLP samples prepared from donor 3 blood. Pure bacterial suspension ( $10^6$  CFU/mL) as positive control and pure sterile Mueller-Hinton broth as negative control were used.
